# Supplementary material for: On the comparison of strain measurements from fibre optics with a dense seismometer array at Etna volcano (Italy)
Source: Copernicus journal article supplement (doi:10.5194/se-12-993-2021), 2021-04-28
Supplement: Supplementary file 1 [file se-12-993-2021-supplement.pdf]

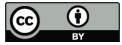

*Supplement of*

## **On the comparison of strain measurements from fibre optics with a dense seismometer array at Etna volcano (Italy)**

**Gilda Currenti et al.**

*Correspondence to:* Gilda Currenti ([gilda.currenti@ingv.it](mailto:gilda.currenti@ingv.it))

The copyright of individual parts of the supplement might differ from the article licence.

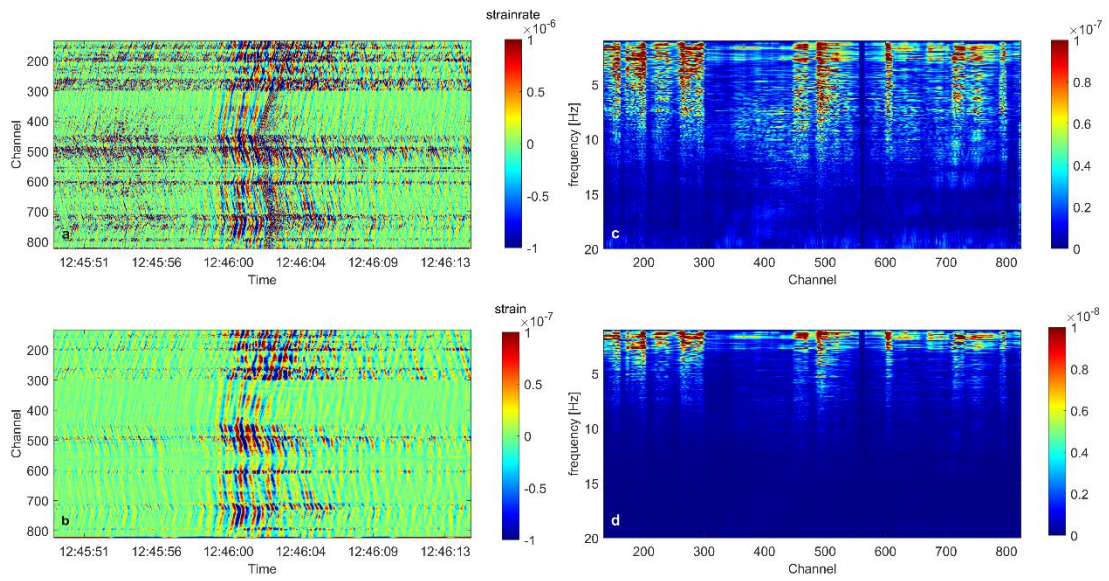

**Figure S1:** Time series (a, b) and spectra (c, d) during a small volcanic explosion (VE) at Etna on 6 July 2019. (a) Raw DAS strainrate; (b) strain computed by integrating over time the raw strainrate data; (c) spectra of the raw strainrate DAS records overall the channel; (d) spectra of strain records.

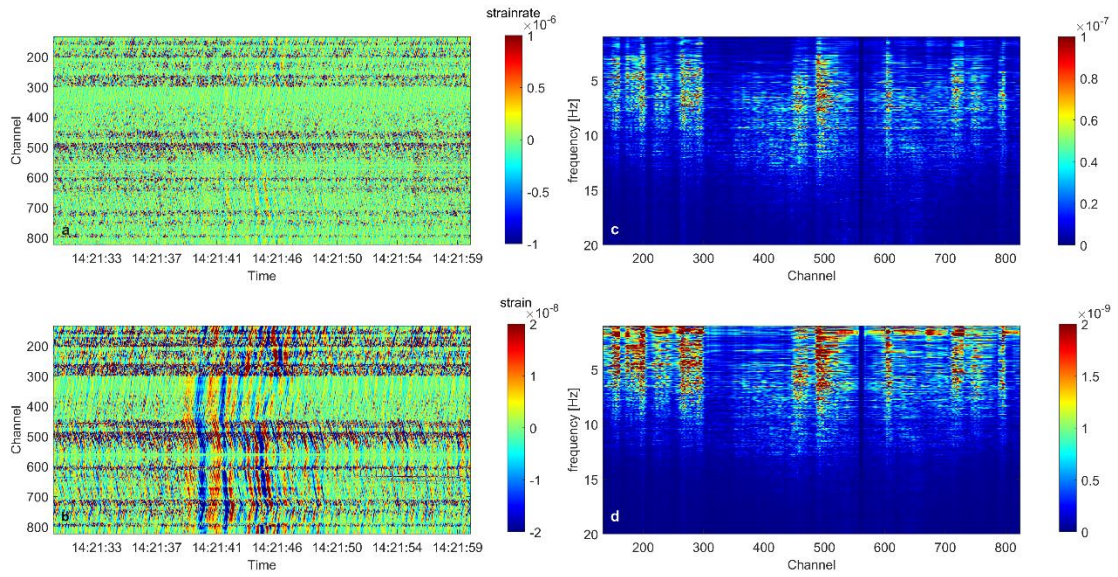

**Figure S2:** Time series (a, b) and spectra (c, d) during an LP event (LP) at Etna on 27 August 2019. (a) Raw DAS strainrate; (b) strain computed by integrating over time the raw strainrate data; (c) spectra of the raw strainrate DAS records overall the channel; (d) spectra of strain records.

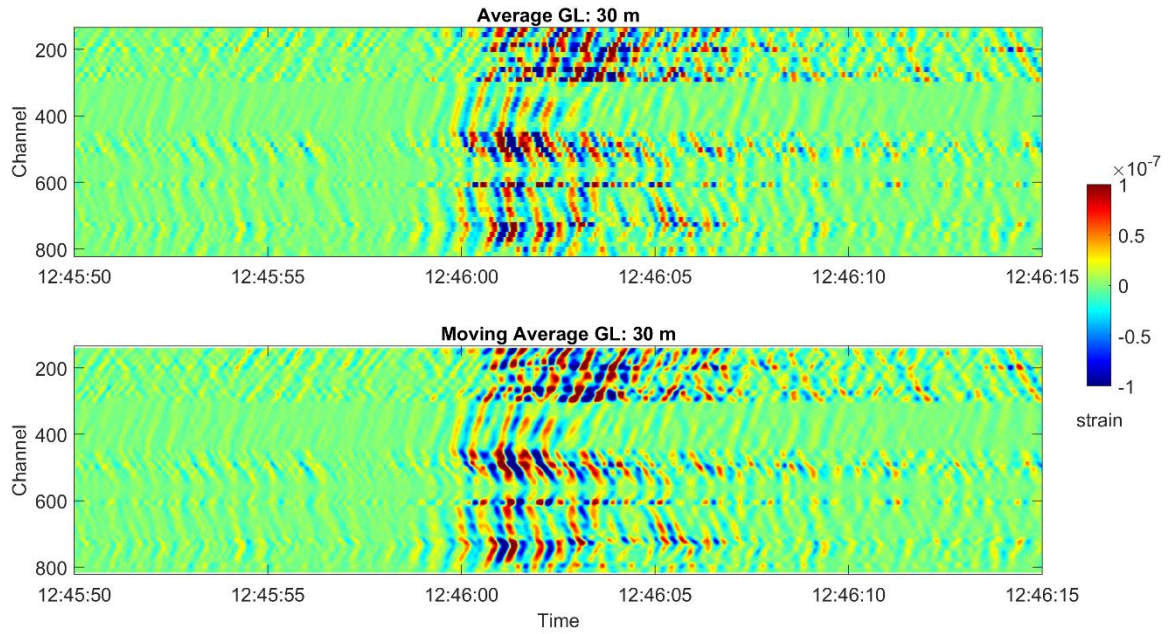

**Figure S3:** Strain data (volcanic explosion on 6 July 2019) after increasing the gauge length to 30 m. Two methods were used: (top) averaging the data every 15 channels (30 m); (bottom) averaging the data with a mobile mean over 15 channels with a shift of 1 channel.

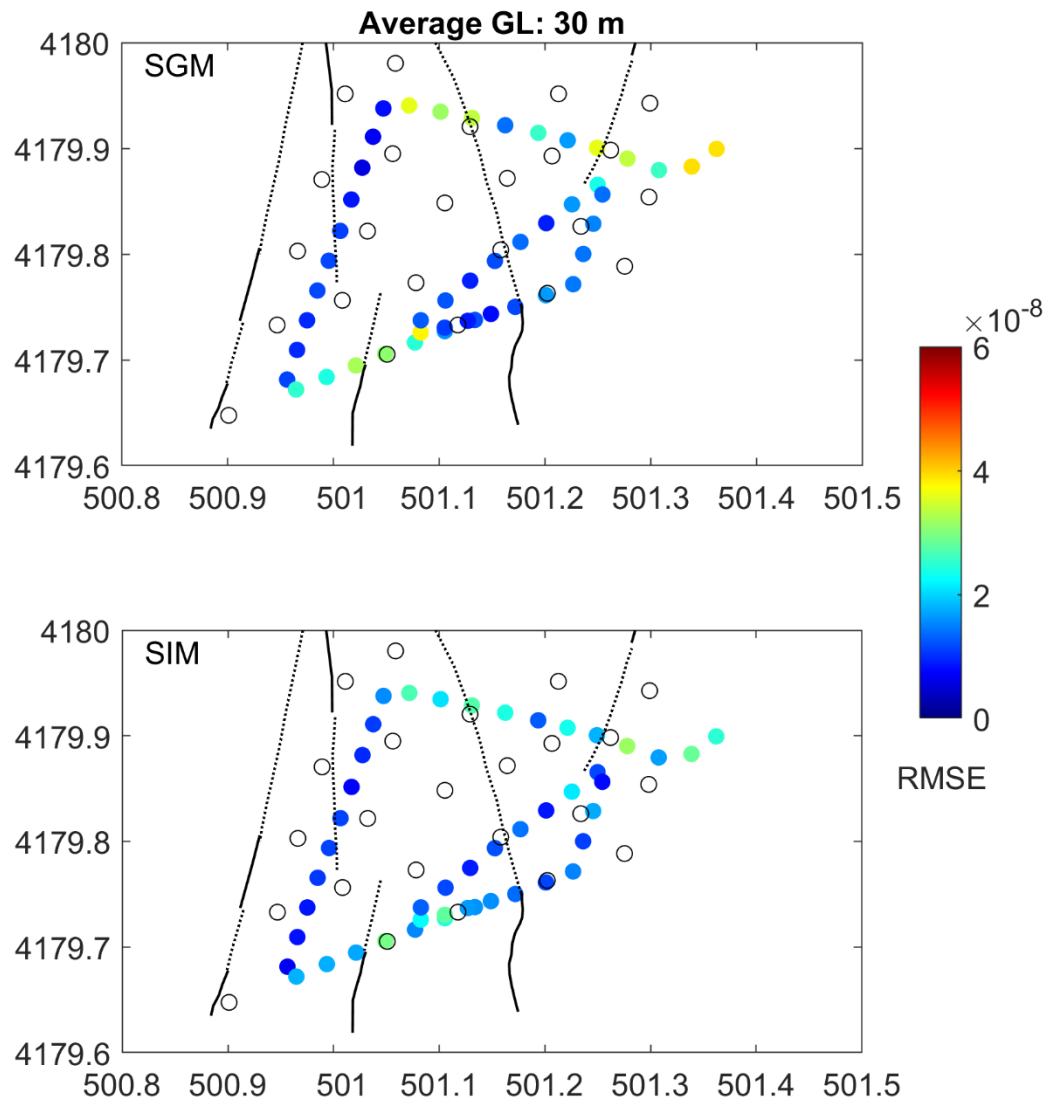

**Figure S4:** Misfits between the array derived strain and the DAS strain data (volcanic explosion on 6 July 2019) after increasing the gauge length to 30 m using a simple average.

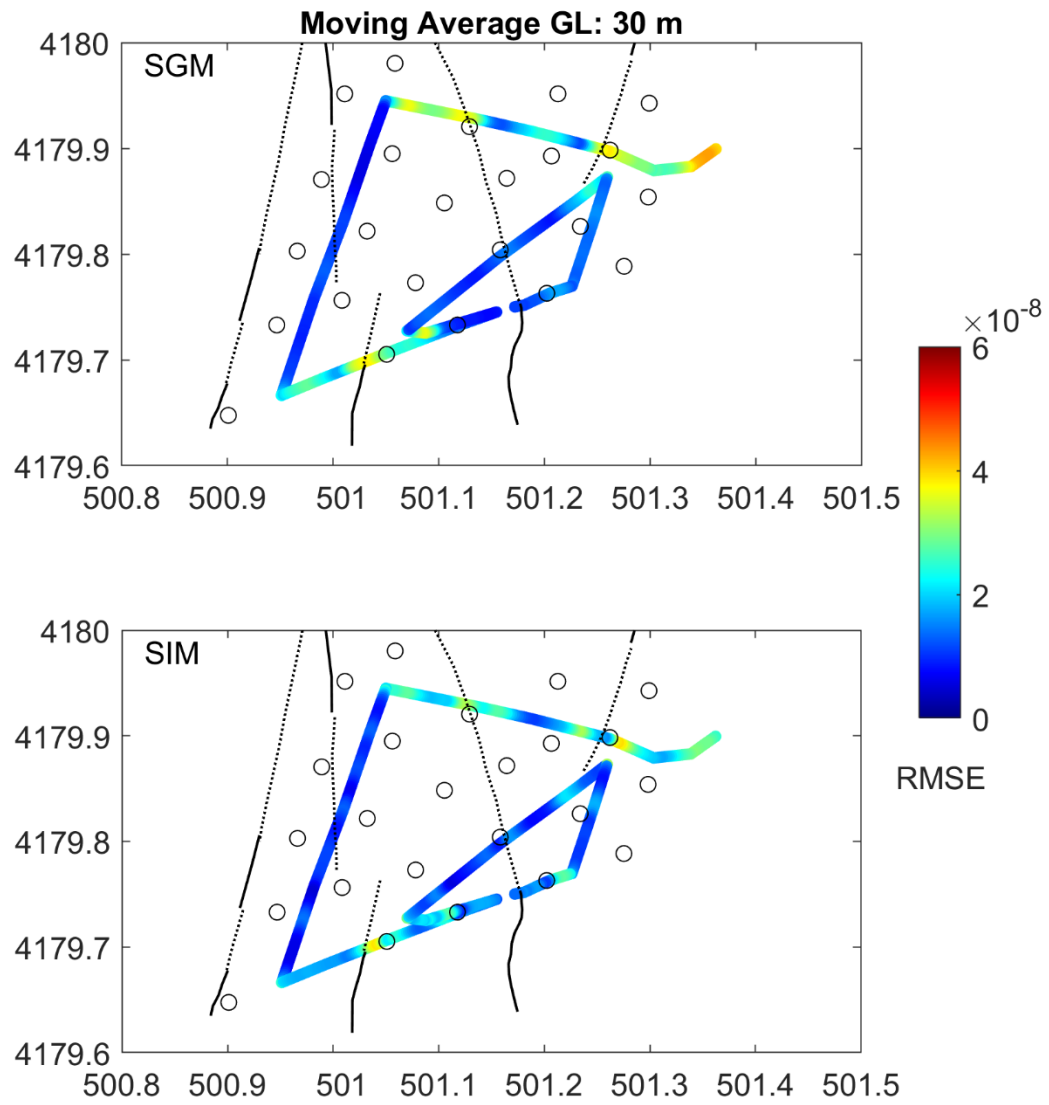

**Figure S5:** Misfits between the array derived strain and the DAS strain data (volcanic explosion on 6 July 2019) after increasing the gauge length to 30 m using a moving average.



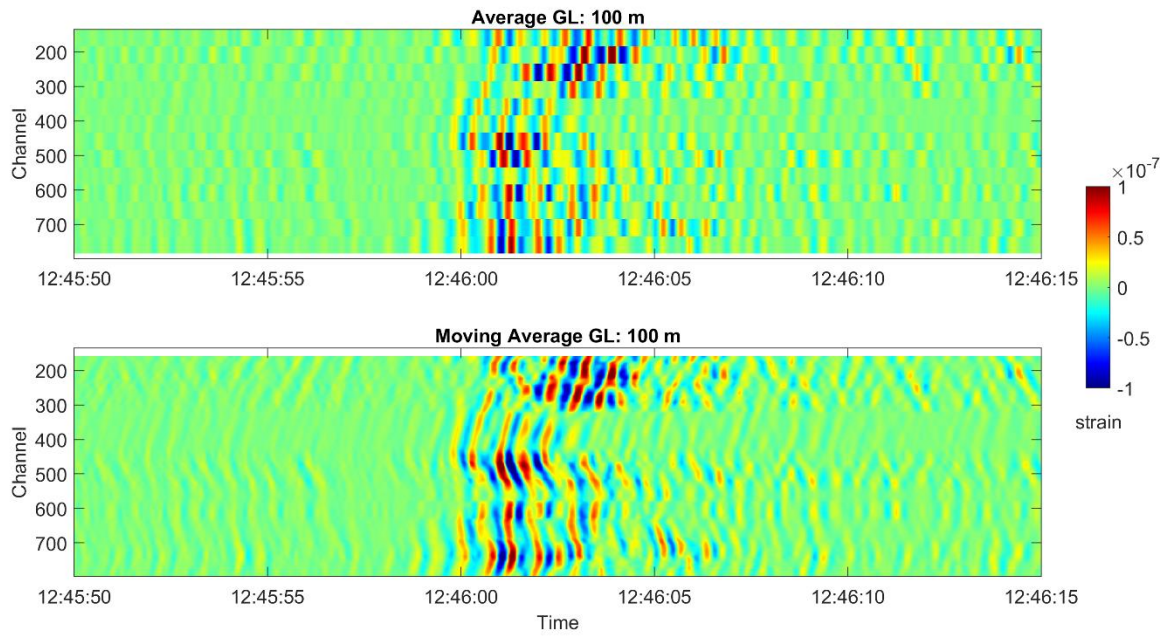

**Figure S6:** Strain data (volcanic explosion on 6 July 2019) after increasing the gauge length to 100 m. Two methods were used: (top) averaging the data every 50 channels (100 m); (bottom) averaging with a mobile mean over 50 channels with a shift of 1 channel.

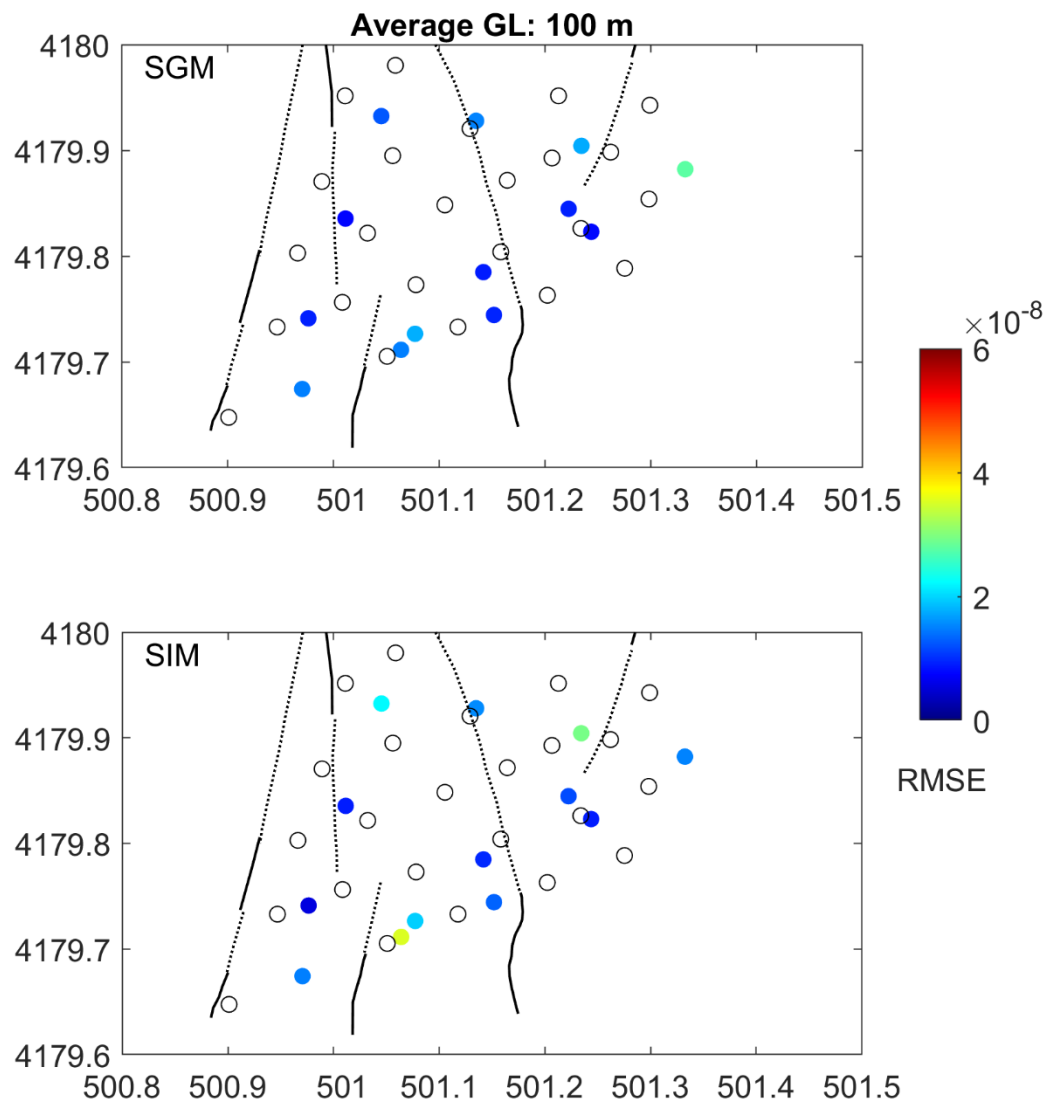

**Figure S7:** Misfits between the array derived strain and the DAS strain data (volcanic explosion on 6 July 2019) after increasing the gauge length to 100 m using a simple average.



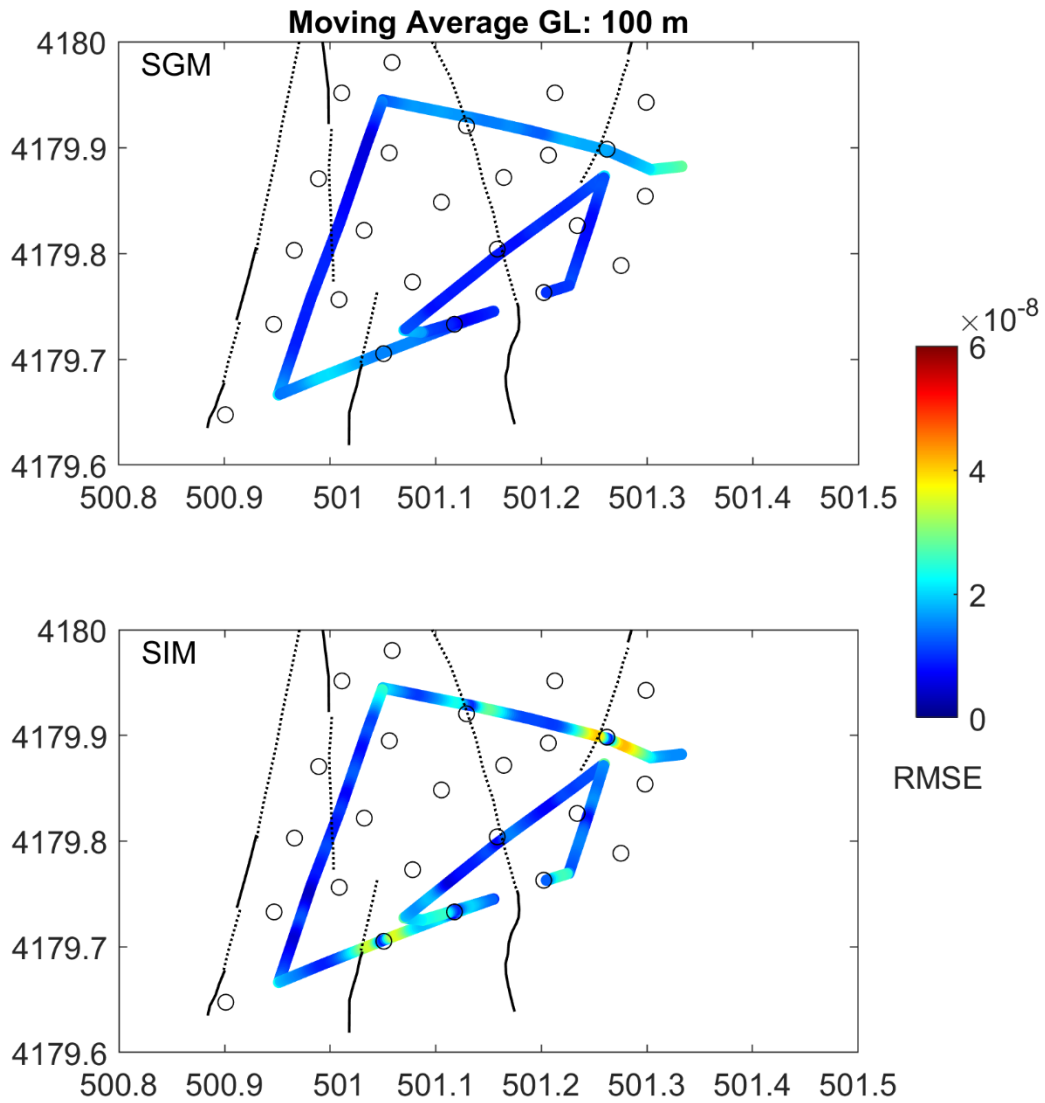

**Figure S8:** Misfits between the array derived strain and the DAS strain data (volcanic explosion on 6 July 2019) after increasing the gauge length to 100 m using a moving average.
